# Supplementary material for: Feasibility of individualised severe traumatic brain injury management using an automated assessment of optimal cerebral perfusion pressure: the COGiTATE phase II study protocol
Source: PubMed Central journal article supplement — BMJ Open. 2019 Sep 20;9(9):e030727. doi: 10.1136/bmjopen-2019-030727 (PMC6756360; doi:10.1136/bmjopen-2019-030727), 2019-09-20
Supplement: bmjopen-2019-030727supp002.pdf [file bmjopen-2019-030727supp002.pdf]

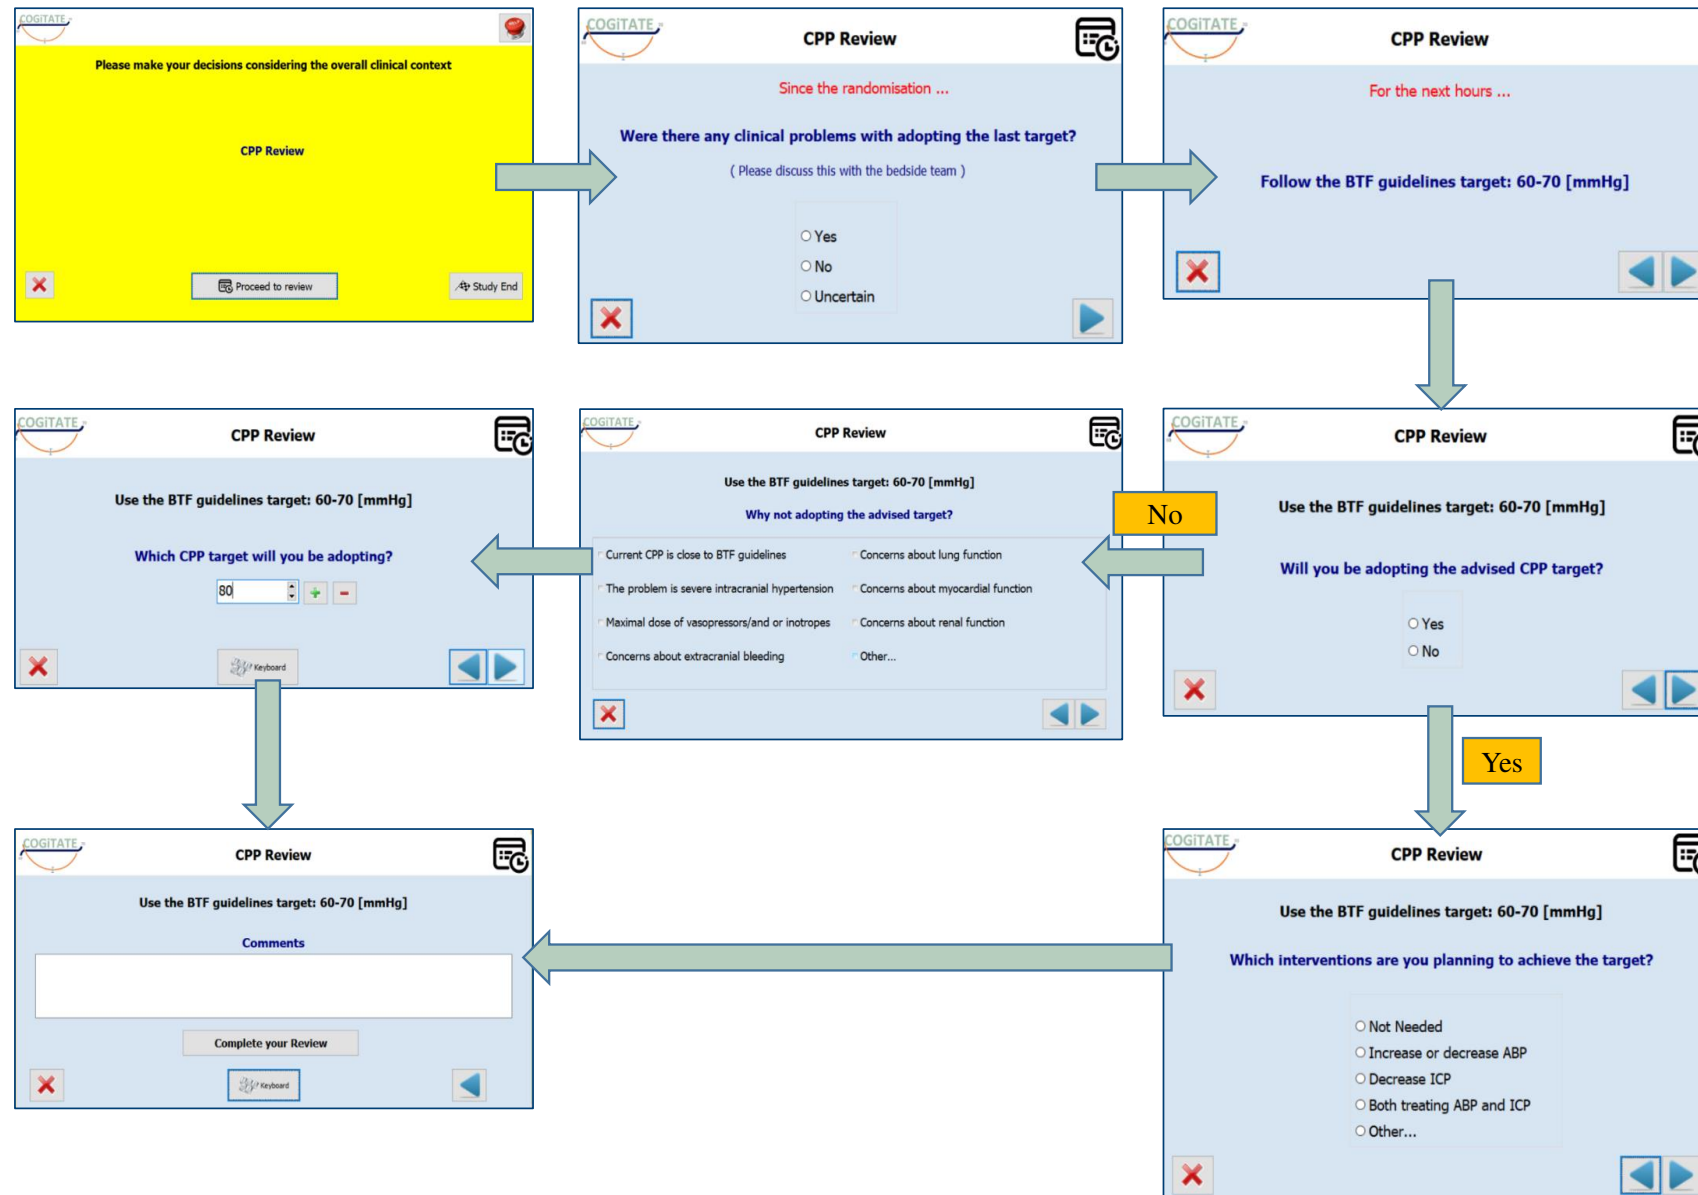

Every 4 h, at fixed time points, the COGiTATE module within ICM+ will pop up a review screen on the data collection computer at the bedside. The review screen will flash yellow, prompting an attending fellow to proceed to the review of the next recommended CPP target. The clinician's decision on the course of action and reasoning behind it will be documented using a set of forms, each comprising one question, with a simple decision tree logic guiding the answers. This will be discussed with the bedside staff and the new CPP target (for the next 4 hours) documented in the patient medical record.
